# Supplementary material
Source: publisher site journal article supplement (https://www.spandidos-publications.com/3577/downloadSupplementary)

Figure S1. Evan exudation in the tissue around the incision increased in SMIR group. Evan exudation in the tissue around the incision increased on days 1, 3 and 7 after surgery in SMIR group. SMIR, skin/muscle incision and retraction.

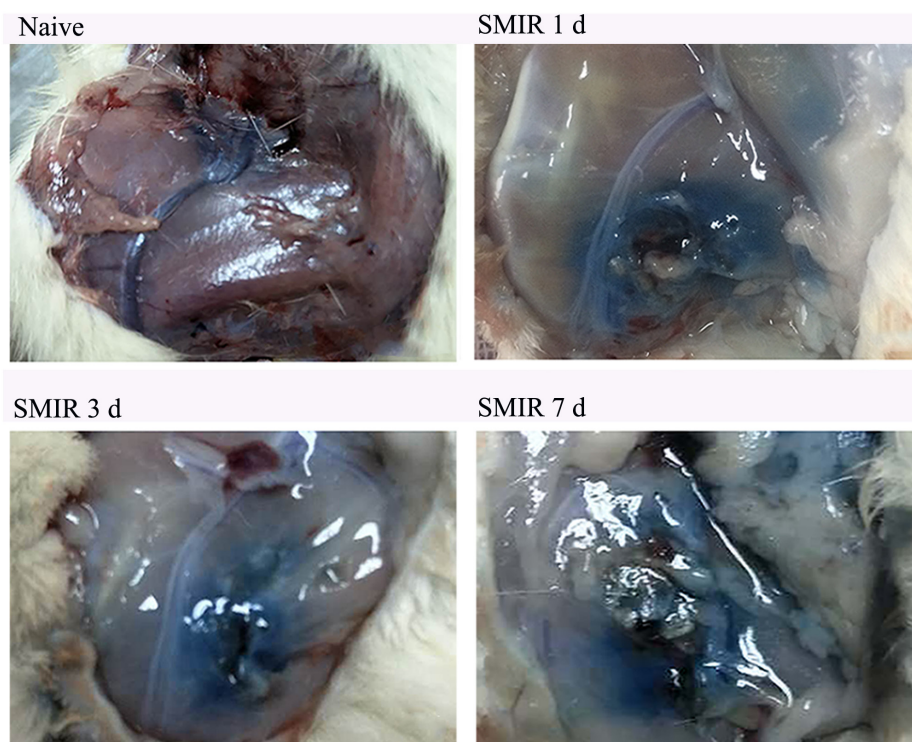

Supplement: Supplementary file 1 [file downloadSupplementary]
